# Supplementary material for: TNL genes in peach: insights into the post-LRR domain
Source: PubMed Central journal article supplement (PMC4851768; doi:10.1186/s12864-016-2635-0), 2016-04-30

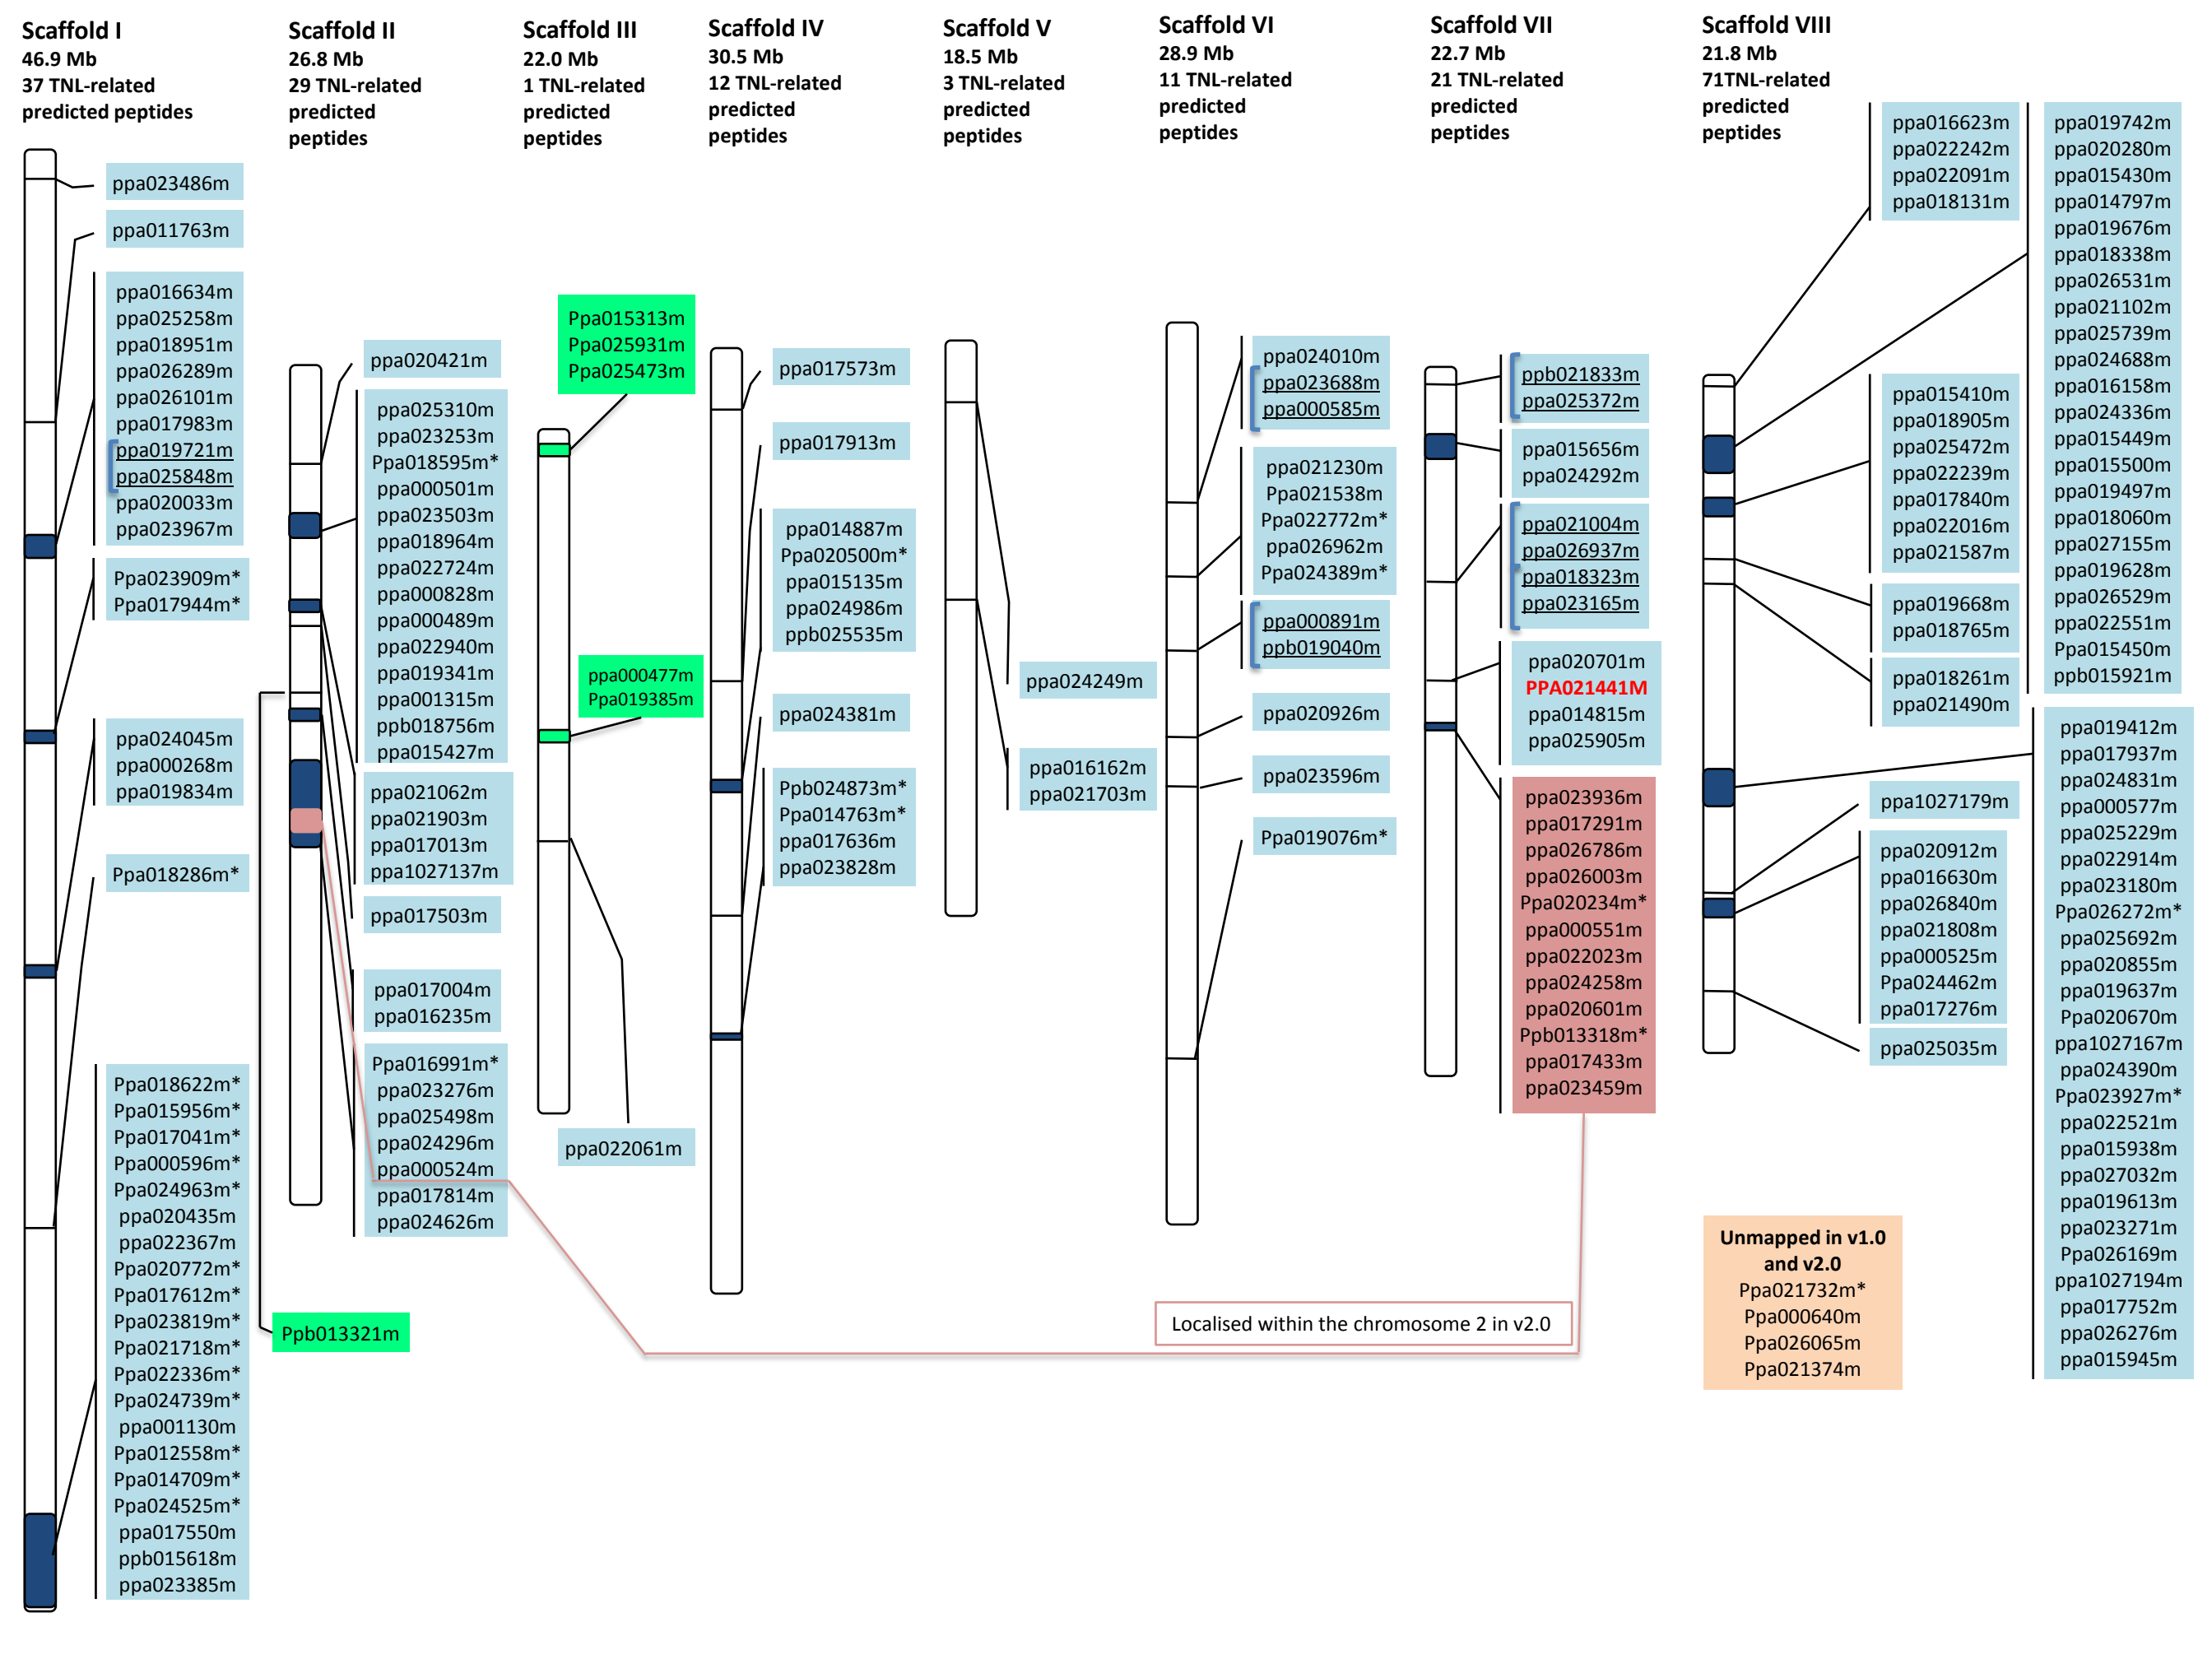

Supplement: 12864_2016_2635_MOESM4_ESM.pdf [file 12864_2016_2635_MOESM4_ESM.pdf]
